# Supplementary material
Source: PubMed Central journal article supplement (PMC7705459)

Source data Figure 4C

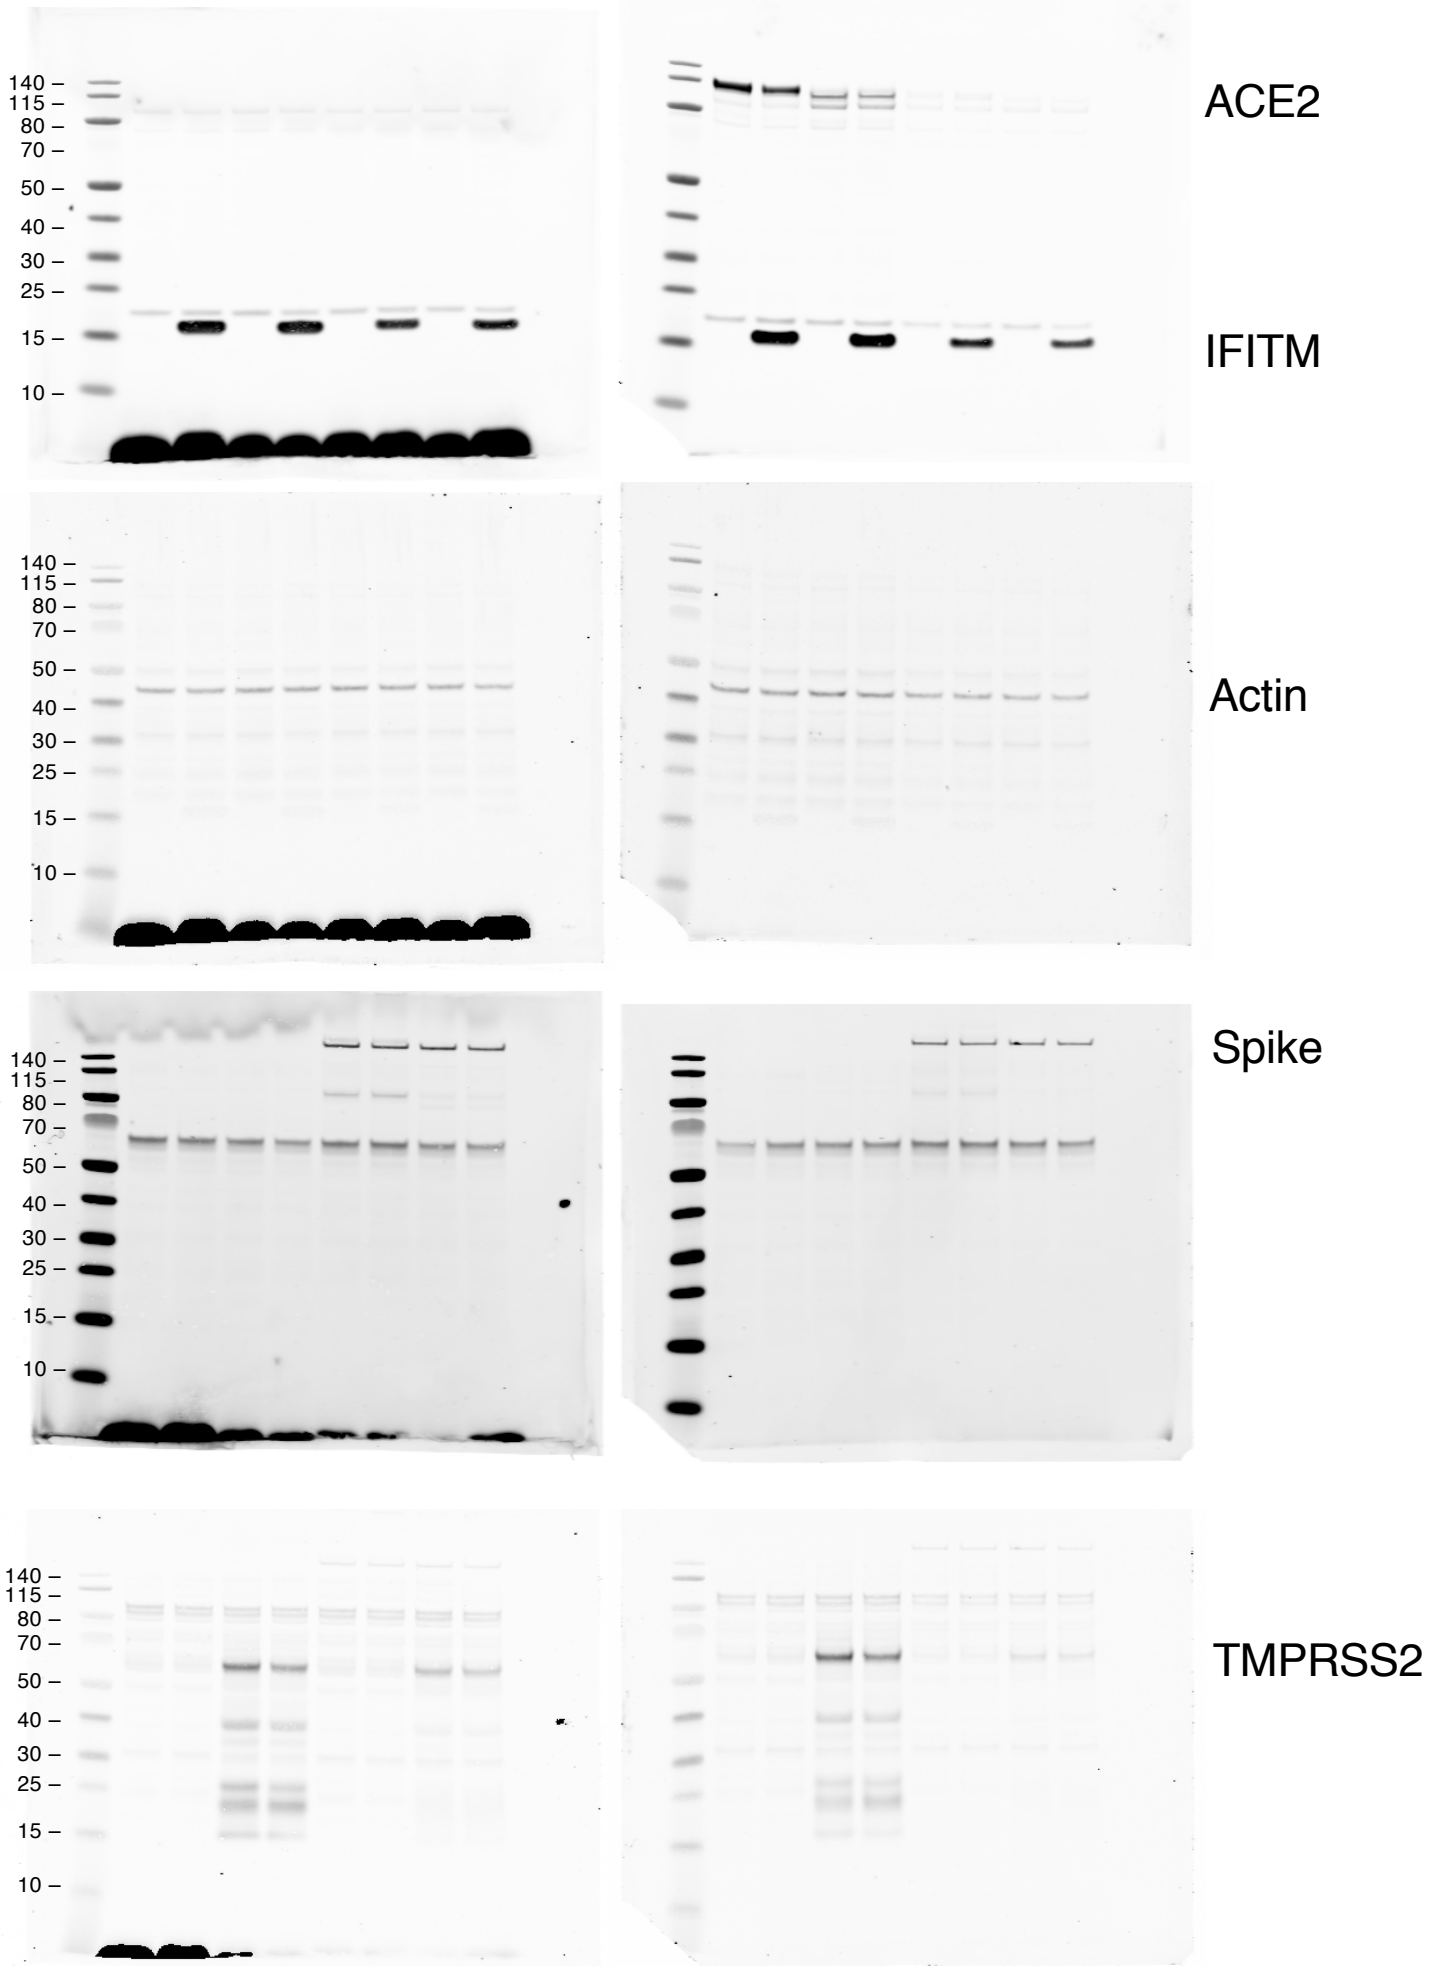

Supplement: EMBJ-39-e106267-s004.pdf [file EMBJ-39-e106267-s004.pdf]
